# Supplementary material for: Analysis of the Putative Role of CR1 in Alzheimer’s Disease: Genetic Association, Expression and Function
Source: PubMed Central journal article supplement (PMC4767815; doi:10.1371/journal.pone.0149792), 2016-02-25
Supplement: pone.0149792.s002.pdf [file pone.0149792.s002.pdf]

**Supplemental Table 1: Summary of CR1 antibody reactivity**

| Antibody          | Source     | IHC- Human Tissue      |            |    | ICC |                | Western blot |    |     |    |     |    |       |    | IP         |      |     |       |
|-------------------|------------|------------------------|------------|----|-----|----------------|--------------|----|-----|----|-----|----|-------|----|------------|------|-----|-------|
|                   |            | Cortex and hippocampus | sCR1 block | CP | CHO | Primary astros | sCR1         |    | RBC |    | PMN |    | Brain |    | sCR1 block | sCR1 | RBC | Brain |
|                   |            |                        |            |    |     |                | R            | NR | R   | NR | R   | NR | R     | NR |            |      |     |       |
| <b>Monoclonal</b> |            |                        |            |    |     |                |              |    |     |    |     |    |       |    |            |      |     |       |
| J3B11 (a)         | Atkinson   | Astros RBC             | Yes        | N  | +   | Yes            |              | +  |     | +  |     |    |       | -  |            | +    | +   | -     |
| 8C9.1 (b)         | Atkinson   | Astros neurons         | Yes<br>No  | N  | +   | Yes            |              | -  |     | -  |     |    |       |    |            | +    | +   | -     |
| E11 (c)           | Abcam      | RBC Vessels?           |            |    | +   |                | +            | +  | +/- | +  | -   | +  | +/-   | +  | Yes        | +    | +   | -     |
| H2 #166329 (d)    | Santa Cruz | Neurons*               | No         |    | -   |                |              | +  |     | +  |     |    | +     | -  |            |      |     |       |
| #594708 (e)       | R&D        | N                      |            | N  | +   |                |              |    |     |    |     |    |       |    |            |      |     |       |
| J3D3 (f)          | Beckman    | RBC Vessels?           |            | N  |     |                | +            | +  | -   | +  | -   | +  | -     | -  |            |      |     |       |
| <b>Polyclonal</b> |            |                        |            |    |     |                |              |    |     |    |     |    |       |    |            |      |     |       |
| pAb (g)           | Atkinson   | Neurons RBC Vessels?   | No         | N  | +   |                | +            | +  |     | +  |     |    | -     | -  |            |      |     |       |
| H-300 #20924 (h)  | Santa Cruz | RBC Vessels?           |            | N  |     |                | +/-          | +  |     |    |     |    | -     | -  |            |      |     |       |

IHC:Immunohistochemistry, ICC: immunocytochemistry, IP: Immunoprecipitation, sCR1 block: absorption with sCR1 blocks staining, CP: choroid plexus, R:reduced, NR: non reduced, N: negative, vessels?:possibly on vessels (EC or pericytes?)

\* hippocampus not investigated (In all other cases both cortex and hippocampus were tested).

a), b), c), e) : Nickells, et al, 1998; d), e), f), h) Hazrati et al,2012; g) Makrides et al,1992.
